# Supplementary material
Source: PubMed Central journal article supplement (PMC519194)
Supplement: plntcell_tpc.104.022830_1.pdf [file plntcell_tpc.104.022830_1.pdf]

## Supplemental Figure 1

### A. Predicted fold-back structures for miRNAs in Table 1

#### *MiR171b* ( $\Delta G$ -54.1)

```
UA A      UG      -      UAC      UG
AAA CG GAUAUUGG CGGUUCAUCAGA AAACCG UCUUU U
UUU GC CUAUAACC GCCGAGUUAGUUU UUUGGC AGAAA U
GC A      GU      A      U--      UU
```

#### *MiR171c* ( $\Delta G$ -48.4)

```
UUUUUAUGCAA AA-- A      A UG      A      --      C      UAA
GGU      CGCG GAUAUU G      CGGUUCAUC AAUAG UCGU CUCU C
CCA      GCGC CUAUAA C      GCCGAGUUAG UUGUU GGCA GAGG U
CGGUAAAAA- AAUG A      C GU      C      GU      A      UAC
```

#### *MiR319c* ( $\Delta G$ -87.7)

```
UAU      A      U      GAAA      A GG      G      AC      C      UC      AA      C      AG      AACG
UAGA      AGAAGGAG UUCUUUCAGUCCAG CAUGGAUA      AAGAAG G      UAGAAUAUCU CCG UCAU CA CA CACU GUGGU AGA \
AUCU      UCUUCCUC AGGGAAGUCAGGU      GUGUCUAU      UUCUUC C      GUUUUUUAUGA GGC AGUA GU GU GUGA CGCCA UUU A
UUU      G      U      ----      - UA      G      GU      A      GU      CA      -      AA      AAAU
```

#### *MiR389b.3* ( $\Delta G$ -25.9)

```
CA-      -      -      U      CGAUA      U      AA
UCCUAAG UCCAA CA AGCGUU      AGA CUUAGAA \
AGGAUUC AGGUU GU UUGCGA      UCU GAAUUUU U
UAA      U      A      -      UACAA      -      AU
```

#### *MiR390a.2* ( $\Delta G$ -53.0)

```
UCACAACCCAAAAAACAAA      --      AU U      A      G      -----      UC
GUAG      AGAAGA      C      GU      AAGCUCAGGA      GGUAAGCGCCA      UGAUGA      A
CAUC      UCUUCU      G      UA      UUUGAGUCCU      CCUAUCGCGGU      AUUGCUC      C
AAAGUAA-----      AU      CG U      C      A      UUUUUUAUCU      UA
```

#### *MiR393a* ( $\Delta G$ -52.9)

```
CAU      A      UA      A      C      U      U-      .-A      U      A
AGC      AC      GAGGA      GGAUCCAAAGGGAU      GCAU      GAUC      AAUUA      GG      GA      U
UCG      UG      UUCCU      CUUAGGUUUUCUCA      CGUA      CUAGG      UUUGU      CC      CU      U
CU-      A      GC      A      U      -      UU      \      -      C      C
```

**MiR393b ( $\Delta G -63.2$ )**

CAC A A U U--- U .-U UU  
AGC ACUAGAGAA GGAUCCAAAGGGAUCGCAU GAUCC AA UAAGC GA \  
UCG UGGUUUCUU CUUAGGUUUCUCUAGCGUA CUAGG UU AUUCG CU U  
--- A A - CCUU C \ - UA

**MiR397a ( $\Delta G -39.9$ )**

UUU-- U C A U G UUU G  
UUCCUGGG GAA GAACAU AUUGAGUGCAGCGUUG UGUAA UUC UUUUG UUCAUU U  
AAGGACUU CUU UUUGUA UAACUCGCGUUGCGAC AUAUU AAG AAAAU AGGUAA U  
UUAUU - U C U - U-- G

**MiR397b ( $\Delta G -34.1$ )**

U C U AUUU A UUCC UU  
GAACAU AUUGAGUGCA CGUUGAUGUA UACUU UUUUA AUUG G  
UUUGUA UAACUUACGU GCGACUAUUA AUGAA GAAAU UAAU A  
- U U ---- - ---- UA

**MiR398a ( $\Delta G -58.0$ )**

AAAGUAUGGAGAAGAA AC- A U AAU A A U UA-- CU UUCAAA  
GAGAAGA AACAGG GG GA UUCAAGG GUGGC UG GAACACA UC AUGGUUUC U  
CUUUUUU UUGUCC CC CU AAGUUUCC CACUG AC CUUGUGU AG UACCAAAG U  
CA----- ACC - U --- C G U UUUG U- UUACCU

**MiR398b ( $\Delta G -51.4$ )**

A U--- U A U A C U CAAC --- C  
GA GGUAG GGA CUCG CAGGG UGAU UGAGAACACA GAG AAU GGCUGUA AUGACG \  
CU CCAUC UCU GAGU GUCCC ACUG ACUCUUGUGU CUU UUG UCGACAU UACUGC U  
G UCUU C C G A - CUC- UGU A

**MiR398c ( $\Delta G -58.2$ )**

AUA UAU UUAU U--- U A U A ----- CAAUCAAC A --- C  
GAUAAA UG GGUAG GGA CUCG CAGGG UGAU UGAGAACAC ACGAG GGCU UAAC GACG \  
CUAUUU AC CCAUC UCU GAGU GUCCC ACUG ACUCUUGUG UGCUC UCGA AUUG CUGC U  
A-- UGU CUG- UCUU C C C G UACUU ----- C UUA A

**MiR399b ( $\Delta G -60.6$ )**

A C- C A C .-CUUCCAA CAC  
UAA CU ACUAGUUUUAGGGCG CUCUCC UUGGCAGGUC UUUU AUAUA A  
AUU GA UGGUCAAAAGUCCCGU GAGAGG AACCGUCCAG AAAU UUAU U  
C CU U A U \ ----- ACA

**MiR399c ( $\Delta G -67.4$ )**

- A U A C U UUU AUCUUUU  
UAAGCGGA GCAGU AUAGGGCA CUUUCU UUGGCAGG GAC UGGCUA GU G  
AUUCGCCU CGUCA UGUCCCGU GAGAGG AACCGUUC CUG AUCGGU CA U  
U C U A A U UAU GUUCUUG

**MiR399f ( $\Delta G -49.1$ )**

AU A A A A U - UU- CU C  
UAC GGGCA GAUC CC UUGGCAGAGA CU AUUAC CAUU UGCAU \  
AUG CCCGU UUAG GG AACCGUCUCU GA UGGUG GUAA ACGUA A  
A- G - A A C G UUU AU U

**MiR400 ( $\Delta G -34.4$ )**

G ACA GU A  
UUAUGAGA UAUAUAAGUCACU UUUG AAGCAA G  
AGUACUCU AUAGUAUUCAGUGA AAC UUUGUU U  
A AGC UC G

**MiR401 ( $\Delta G -79.3$ )**

U CAA U A C C C- CUUCUGA U A UUUAG UUGCUG- C AAC C CAA  
GGGAC AAUAAG AUA GGA AU UU UGGGGCAAA UUGAG AAACU GA AGCG GGUUU GGC GA GGUGUCGA CGACAC \  
CCUG UUGUUAC UAU CCU UG AA ACCUCGUUU GAUUC UUUGA UU UUGC CCAAG UCG CU UCACAGCU GCUGUG G  
- CUC U C U A UU CUUUUCC - C UAAAA UCCUUAG - AC-- C UGA

**MiR402 ( $\Delta G -95.5$ )**

UUAAG G U U CCUUU UUAACCCAUUUUUUC C U ACAUCU - AAGUU UUUU GAAA- UG A-- --- C A --- UU  
UGGUAGA UUU AGU GCAUAGUGGCAG CUU GUUUG AUGAUUCGAGG CUAU AAACCCUCUUU GCU UUUUGAA GUCA UCU UCUUCU CCUCA UUUC CAA AGC GAU UCAUCU C  
ACUAUUU AAA UCA CGUAUCAUCUC GAG CAAAC UACUAAGCUCU GAUA UUUUGGGAUAA CGA AAAGCUU CAGU AGA AGAAGG GGAGU AAAG GUU UUG UUG AGUAGG A  
CA-- G U U ----- UA----- A - AAUUUC U ----- C--- AUUAA GU AAA AUU U A CCU UU

**MiR403 ( $\Delta G -36.7$ )**

AUUA U U AU U U .-G UU  
GAAGAG CG AUUAC GUUU GUGC UGAAUCUAAUUCACAA GC \  
CUUUUC GU UAAUG CAAA CACG ACUUAGAUUAGGUUGU UG U  
---- U C CU - C \ - UA

**MiR404 ( $\Delta G -86.7$ )**

U UUU UUAAC G GUG A CU C- G  
CG CA GCU GCGGUUGCGGCAGCGGCUGCGGUAGCG GCGGCAA CA AC GCAG U  
GC GU UGG CGCCAACGCCGUCGCCGACGCCGUCGC CGCCGUU GU UG UGUU U  
U UU- UUCUU A AGA - UU CU G

**MiR405a ( $\Delta G -79.3$ )**

```
UCA      G      ACC--  C      UAA      GUUUUUGAUUA      -      U
  AAAUGG UAACCCA      CAAC CAACUCA      UCAAAUGA      AAUGAGUUUUGGGUU GACCCAACUCAUUU G
  UUUACC AUUGGGU      GUUG GUUGGGU      AGUUUACU      UUACUCAAUACCCAA CUGGGUUGAGUAAA U
  ---      A      AAAUU      A      ---      -----      U      U
```

**MiR405b ( $\Delta G -51.3$ )**

```
AUCAA      ---      -      U
  AUGA      AAUGAGUUUUGGGUU GACCCAACUCAUUU G
  UACU      UUACUCAAUACCCAA CUGGGUUGAGUAAA U
  -----      AAU      U      U
```

**MiR405c ( $\Delta G -68.0$ )**

```
ACCC      -----      A
  AUCAAAUGA      AAUGAGUUUUGGGUUAGACCCAACUCAUUU A
  UAGUUUACU      UUACUCAAUACCCAAUCUGGGUUGAGUAAA C
  ----      CAAUAUUAAU
```

**MiR405d ( $\Delta G -48.2$ )**

```
UU      U
  AAAUGAGUUUUGGGUUAGACCCAACUCAUUU G
  UUUACUCAAUACCCAAUCUGGGUUGAGUAAA U
  --      U
```

**MiR406 ( $\Delta G -29.8$ )**

```
UAA      UCA      AGCACAUUCAAU      --      A      C      A      A      UUAAA      -      GAG---      AC      AA
  UUUUUAGUUA      CGAUUU      CUAU      AGAUUUG      UUUUU      UUUU      UU      GUUC      UUUUG      AUUU      ACAGUA      UAUUC      \
  AAAAAUCAAU      GCUAAA      GAUA      UCUGAGC      AAAAA      AAAA      AA      UAAG      AAAGC      UAAG      UGUUAU      GUAAG      A
  ---      UA-      AAU-----      CU      A      A      A      C      CAAAG      C      ACCUAA      C-      AU
```

**MiR407a ( $\Delta G -139.0$ )**

```
A-----      C      U      CAA      A      A      C      CC      A      A      C      AA
  UGGAAAAAUGUUAAAAAAU      GCCAACUUU      AAAAAUGGGA      AAAAAUCGCCAACUCCUGAAAUGUC      UUU      AAUCAUAUACUUUUGGUUGA      UUUU      AGAAAGAUAAUA      AGCAAAG      UU      GU      \
  ACCUUUUUUACAGUUUUUUUA      CGGUUGAAA      UUUUUACCCU      UUUUUAGUGGUUGAGGACUUUACAG      AAA      UUAGUGUAUGAAAACUAACU      AAGA      UCUUUUAUUUGU      UCGUUUC      AA      CA      U
  GUUAUUUAGUA      A      C      AC-      C      A      C      AA      C      A      A      AC
```

**MiR408 ( $\Delta G -78.3$ )**

```
A      UU-      GAAGAC--      G      --      ---      -----      CAA      A      AUU      UUU      U      UUAAA
  UUGGUA      GCAAUGAAA      AAAGC      GU      AAUGA      GAGAGAGA      CAGGGAA      GCAG      GCAUGG      GAG      AC      AAAACA      \
  AAUCGU      CGUUUUUUU      UUUCG      CA      UUACU      CUCUCUCU      GUCCCUU      CGUC      CGUACC      CUC      UG      UUUUGU      C
  C      CAU      AAGGUAAC      A      CU      UUC      CUUUUAUUCUCUUUUUUUCUCCUCG      CUC      A      CAU      ---      -      CUCAG
```
