# Supplementary material
Source: PubMed Central journal article supplement (PMC519194)
Supplement: plntcell_tpc.104.022830_3.pdf [file plntcell_tpc.104.022830_3.pdf]

### Supplementary Figure C

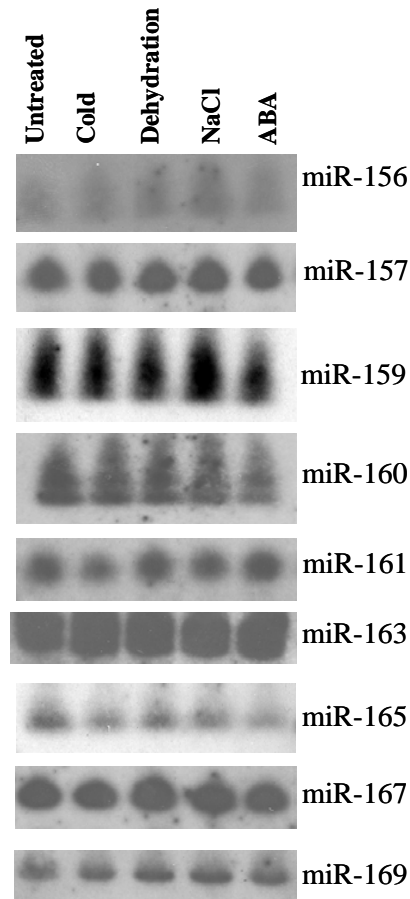

Northern blot analysis of some of the previously reported miRNAs for their regulation by abiotic stresses. Total RNA (40  $\mu$ g) isolated from 2-week-old seedlings untreated or treated with different abiotic stresses was resolved on denaturing 15% polyacrylamide gels and transferred to Hybond-N+ (Amersham) membrane and probed with the labeled oligonucleotides complementary to the indicated miRNAs.
