# Supplementary material
Source: PubMed Central journal article supplement (PMC519194)
Supplement: plntcell_tpc.104.022830_4.pdf [file plntcell_tpc.104.022830_4.pdf]

Supplementary Table 1.

Previously reported *Arabidopsis* miRNAs represented in the library. Frequency of cloning is indicated in parentheses after the miRNA sequences.

*MiR156*- UGACAGAAGAGAGUGAGCAC (3)  
*MiR157*- UUGACAGAAGAUAGAGAGCAC (2)  
*MiR158*- UCCCCAAUGUAGACAAAGCA (12)  
*MiR159*- UUUGGAUUGAAGGGAGCUCUA (3)  
*MiR161*- UUGAAAGUGACUACAUCGGGG (3)  
*MiR163*- UUGAAGAGGACUUGGAACUUCGAU (1)  
*MiR166*- UCGGACCAGGCUUCAUUCCCC (4)  
*MiR168*- UCGCUUGGUGCAGGUCGGGAA (3)  
*MiR169*- CAGCCAAGGAUGACUUGCCGA (4)  
*MiR171*- UGAUUGAGCCGCGCCAAUAUC (6)  
*MiR172*- AGAAUCUUGAUGAUGCUGCAU (2)  
*MiR173*- UUCGCUUGCAGAGAGAAAUCAC (1)  
*MiR319a*- UUGGACUGAAGGGAGCUCCC (3)
