# Supplementary material
Source: PubMed Central journal article supplement (PMC519194)
Supplement: plntcell_tpc.104.022830_5.pdf [file plntcell_tpc.104.022830_5.pdf]

Table 2. Calculated internal stability profiles of pre-miRNA hairpins. Position indicated is from the 5' antisense termini.

| position | miR171b | miR171c | miR319c | miR389b.2 | miR389b.3 | miR390a.2 | miR393a | miR393b | miR397a | miR397b | miR398a | miR398b | miR398c | miR399b | miR399c | miR399f | miR400 | miR401 | miR402 | miR403 | miR404 | miR405a | miR405b | miR405c | miR405d | miR406 | miR407a | miR408 |
|----------|---------|---------|---------|-----------|-----------|-----------|---------|---------|---------|---------|---------|---------|---------|---------|---------|---------|--------|--------|--------|--------|--------|---------|---------|---------|---------|--------|---------|--------|
| 1        | -4.8    | -4.8    | -2.3    | -8        | 0.8       | 0.2       | -5.9    | -5.9    | -2      | -6.6    | -5.2    | -5.5    | -5.5    | -11.4   | -12.1   | -12.1   | -8.8   | -7     | -9     | -4     | -11    | -5.4    | -5.4    | -5.4    | -5.5    | 0      | -5.4    | -10.8  |
| 2        | -5.9    | -5.9    | -1.7    | -5.5      | 3.3       | -4        | -1.8    | -1.8    | -1.6    | -6.2    | -4      | -4.3    | -4.3    | -7      | -7.8    | -5.6    | -7.6   | -3.7   | -9.1   | -2.3   | -10.9  | -7.8    | -7.8    | -7.8    | -5.4    | 0      | -4.8    | -11.1  |
| 3        | -4.4    | -4.4    | -4.9    | -0.2      | 3.9       | -6.1      | -1.8    | -1.8    | -4.1    | -7.6    | -5.8    | -3.4    | -3.4    | -3.7    | -4.5    | -2.3    | -6.5   | -3.7   | -8.5   | -0.1   | -11.2  | -9.8    | -9.8    | -9.8    | -7.8    | -2.2   | -4.8    | -9.9   |
| 4        | -2.2    | -5.4    | -5.5    | 0.2       | 0         | -7.6      | -1.5    | -1.5    | -7.6    | -7.6    | -8.3    | -5.9    | -5.9    | -2.4    | -3.2    | -0.2    | -4.4   | -3.7   | -7.3   | -1.4   | -12.5  | -10.9   | -10.9   | -10.9   | -9.8    | -4.3   | -6.1    | -3.9   |
| 5        | -0.9    | -7.4    | -5.1    | 0.8       | 0         | -9.1      | -4.9    | -4.9    | -8      | -5.5    | -5      | -4.2    | -4.2    | -3.4    | -2.4    | 0.8     | -4.2   | -6.1   | -4     | -2.6   | -11.2  | -9.7    | -9.7    | -9.7    | -10.9   | -4.9   | -6.5    | -0.6   |
| 6        | -4.7    | -11.2   | -6      | 2.4       | -2.1      | -8.7      | -6.6    | -9      | -8      | -3.9    | -2.9    | -2.1    | -2.1    | -6.6    | -4      | -4.8    | -4.7   | -9.4   | 0.7    | -7.7   | -8.8   | -4.7    | -7.7    | -7.7    | -9.7    | -6.3   | -6.7    | 1.8    |
| 7        | -3.8    | -10.3   | -6      | -1.4      | -4.5      | -9.9      | -4.4    | -10.3   | -7.6    | -3.5    | -3.5    | -1.8    | -1.8    | -9      | -6.4    | -4.4    | -4.6   | -9.1   | 0.5    | -6.6   | -8.6   | -1.4    | -6.5    | -6.5    | -4.7    | -5.4   | -5.6    | 2.7    |
| 8        | -4.9    | -8.2    | -7.5    | -1.4      | -2.9      | -9.9      | -3.4    | -9.3    | -8.6    | -4.5    | -1.3    | -2.8    | -2.8    | -10.2   | -6.4    | -3.1    | -4.7   | -8.9   | 0.1    | -4.4   | -8.5   | -1.6    | -6.7    | -6.7    | -1.4    | 0.4    | -4.8    | -3.4   |
| 9        | -7.3    | -7.3    | -8.8    | -4.7      | -2.9      | -6.7      | -2.4    | -8.3    | -7.5    | -6.6    | -2.4    | -6.6    | -6.6    | -6.7    | -3.4    | -5.3    | -2     | -8.6   | -2     | -4.4   | -8.8   | -2.9    | -8      | -8      | -1.6    | 1      | -5.6    | -5.5   |
| 10       | -5.7    | -5.7    | -8.8    | -8.7      | -2.9      | -4.6      | -4.5    | -8      | -9.4    | -9      | -4.8    | -9      | -9      | -4.6    | -2.8    | -1.8    | -3.7   | -6.4   | -4.5   | -3.4   | -11.3  | -7.9    | -10     | -10     | -2.9    | 2.4    | -6.9    | -7.6   |
| 11       | -8.2    | -8.2    | -10     | -7.8      | -1.4      | -4.6      | -7.1    | -7.1    | -9.4    | -7.5    | -3.6    | -7.8    | -7.8    | -3.1    | -1.3    | -2.2    | -2     | -4.3   | -3     | -5.4   | -9.1   | -11.2   | -11.2   | -11.2   | -7.9    | 2.7    | -7      | -7.2   |
| 12       | -8.8    | -8.8    | -10     | -4.1      | -4.3      | -4.6      | -8.1    | -8.1    | -8.4    | -6.5    | -5.5    | -7.6    | -7.6    | -1.9    | -1.3    | -3.1    | -2.8   | -2.1   | -5     | -6.5   | -4.7   | -10.9   | -10.9   | -10.9   | -11.2   | -2.1   | -6.5    | -3.8   |
| 13       | -8.8    | -8.8    | -8.4    | -2.9      | -4.9      | -6.8      | -6.6    | -6.6    | -9.1    | -6.5    | -7.6    | -7.6    | -7.6    | -6.3    | -6.3    | -1.9    | -5.2   | 0      | -5     | -6.8   | -4.4   | -9.6    | -9.6    | -9.6    | -10.9   | -3     | -4.4    | -5.1   |
| 14       | -7.6    | -7.6    | -4.9    | -1.4      | -4.1      | -8.1      | -5.4    | -5.4    | -7.5    | -6      | -7.4    | -7.4    | -7.4    | -9.7    | -9.7    | -6.3    | -9     | 4.4    | -7.4   | -6.5   | -3.5   | -8.5    | -8.5    | -8.5    | -9.6    | -5.4   | -0.3    | -5.1   |
| 15       | -6      | -6      | -1.6    | -2.7      | -4.1      | -6.9      | -6      | -6      | -6.5    | -6.5    | -8.6    | -8.6    | -2      | -10.9   | -10.9   | -9.7    | -7.7   | 2      | -10.2  | -6.9   | -3.5   | -7.3    | -7.3    | -7.3    | -8.5    | -0.3   | -0.1    | -6.6   |
| 16       | -6.5    | -6.5    | -1.6    | -6.4      | 2.5       | -7.9      | -7.2    | -7.2    | -4.1    | -4.1    | -3.8    | -5.3    | -2      | -10.9   | -9.4    | -10.9   | -6.6   | 2      | -9.3   | -6.7   | -4.6   | -7.6    | -7.6    | -7.6    | -7.3    | 0.8    | -0.1    | -8.7   |
| 17       | -6.5    | -6.5    | -2.4    | -7.6      | 3.1       | -9.2      | -8.7    | -8.7    | -0.3    | -0.3    | -1.7    | -3.2    | -2.3    | -10.9   | -8.2    | -10.9   | -5.5   | 3.4    | -8.1   | -5.4   | -2.5   | -8.8    | -8.8    | -8.8    | -7.6    | 1.7    | -0.1    | -8.6   |
| 18       | -3.3    | -6.5    | -3.2    | -9.1      |           | -11.3     | -8.9    | -8.9    | -0.5    | -0.5    | 0.5     | -3.4    | -2.5    | -9.7    | -5.2    | -10     | -4.3   | -4.4   | -6.8   | -4.6   | 0      | -7.7    | -7.7    | -7.7    | -8.8    | 4.1    | -0.7    | -5.2   |
| 19       | -2.4    | -6.2    |         | -7.8      |           | -12.5     | -8.1    | -8.1    | -1.5    | -1.5    | 2.6     | -1.9    | -9.1    | -10     | -3.1    | -8.7    | -4.6   | -4.1   | -6.8   | -4.8   | 0      | -6.5    | -6.5    | -6.5    | -7.7    | 0      | -2.2    | -4.1   |
|          |         |         |         |           |           |           | -6.3    | -6.3    | -3.7    | -3.7    |         |         |         |         |         |         |        |        |        |        |        | -5      | -5      | -5      | -6.5    |        |         |        |
